# Supplementary material for: Fiber-optic thin film chemical sensor of 2,4 dinitro-1-chlorobenzene and carbon quantum dots for the point-of-care detection of hydrazine in water samples
Source: Royal Society of Chemistry journal article supplement (doi:10.1039/d4ew00195h), 2024-01-01
Supplement: d4ew00195h1.pdf [file d4ew00195h1.pdf]

## Fiber-optic thin film chemical sensor of 2, 4 Dinitro-1-chl

### Supplementary Information

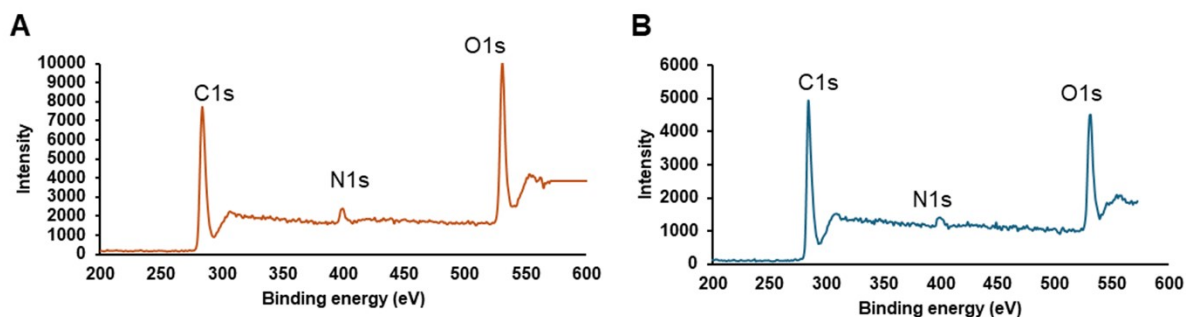

**Figure S1:** XPS analysis of: A) CQDs-DNCB thin film, B) Bare CQDs.

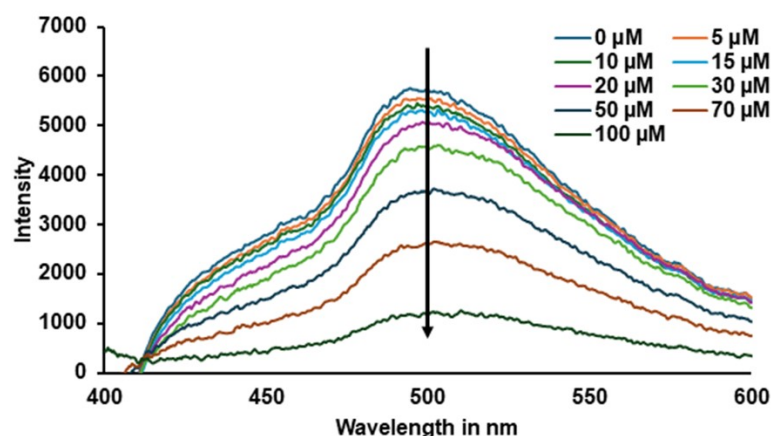

**Figure S2:** Overlay spectra of hydrazine sensing with DNCB-CQDs thin film.

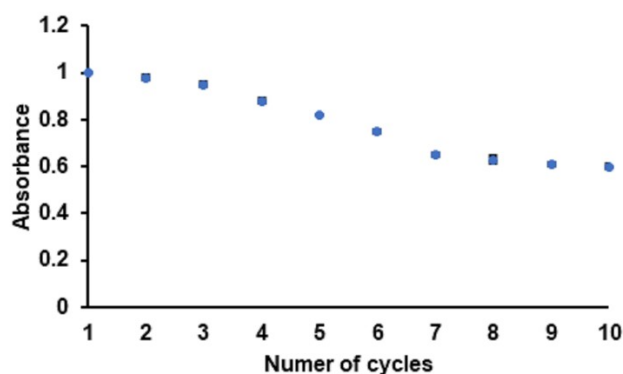

**Figure S3:** Leaching study of DNCB from DNCB-CQDs thin film

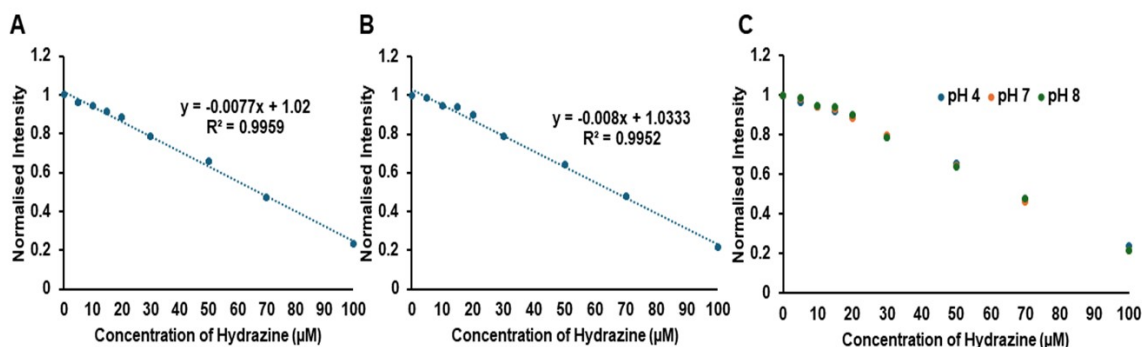

**Figure S4:** Calibration curve of different concentration of hydrazine with fluorescence intensity of DNCB-CQDs thin film in different pH buffers: A) with pH 4 buffer, B) with pH 8 buffer, C) Comparison of calibration curve of different concentration of hydrazine with fluorescence intensity of DNCB-CQDs thin film in different pH buffers pH 4, pH 7 and pH 8.

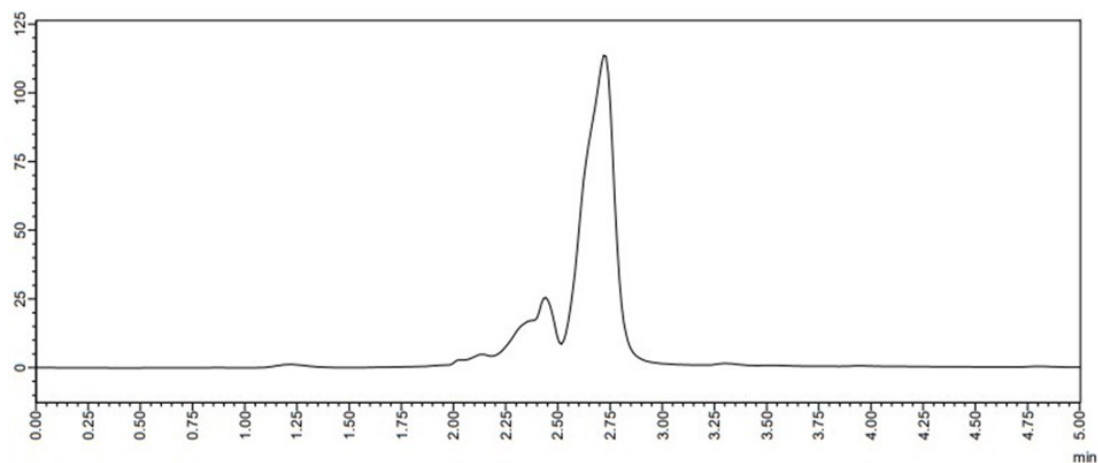

**Figure S5:** HPLC Retention time curve of Hydrazine detection.
